# Supplementary material
Source: PubMed Central journal article supplement (PMC2832956)

## Supplemental data

### POLY(ADP-RIBOSE) POLYMERASE-3 (PARP-3) IS A MONO-ADP RIBOSYLASE THAT ACTIVATES PARP-1 IN ABSENCE OF DNA

Olga Loseva<sup>1, †</sup>, Ann-Sofie Jemth<sup>1, †</sup>, Helen E. Bryant<sup>2</sup>, Herwig Schüler<sup>3</sup>, Lari Lehtiö<sup>3, ‡</sup>, Tobias Karlberg<sup>3</sup>, Thomas Helleday<sup>1, 4, \*</sup>

<sup>1</sup>Department of Genetics, Microbiology and Toxicology, Stockholm University, S-10691 Stockholm, Sweden. <sup>2</sup>The Institute for Cancer Studies, University of Sheffield, Sheffield S10 2RX, UK <sup>3</sup>Structural Genomics Consortium, Department of Medical Biochemistry and Biophysics, Karolinska Institutet, S-17177 Stockholm, Sweden. <sup>4</sup>Gray Institute for Radiation Oncology and Biology, University of Oxford, Oxford OX3 7DQ, UK.

Running head: Biochemical characterization of PARP-3

Address correspondence to: Thomas Helleday, GMT, SU S-10691, Sweden, tel. +46 8 16 29 14. fax: +46 8 16 4315. e-mail: helleday@gmt.su.se

**Table 1**

#### IC<sub>50</sub> values determined for the PARP inhibitors against PARP-3 and PARP-1

| Inhibitor | PARP-3       | PARP-1         |
|-----------|--------------|----------------|
| KU0058948 | 85 ± 2 nM    | 0.7 ± 0.03 nM  |
| DR2313    | 65 ± 0.2 μM  | 96 ± 11 nM     |
| 4-ANI     | 440 ± 7 μM   | 23 ± 1 nM      |
| DIQ       | 370 ± 60 μM  | 0.19 ± 0.03 μM |
| NAP       | 650 ± 160 μM | 18 ± 0.3 nM    |
| PJ34      | 620 ± 60 μM  | 0.17 ± 0.05 μM |
| 3-ABA     | 760 ± 10 μM  | 8.7 ± 0.2 μM   |

Apparent IC<sub>50</sub> values of PARP-1 and PARP-3 for the inhibitors were estimated by fitting an inhibition curve to the intensities of the ADP-ribose signal after 5 minutes of reaction in presence of various concentrations of the inhibitors. Quantification of ADP-ribosylation was carried out using Adobe Photoshop CS2.

#### FIGURE LEGEND

**Supplemental Fig. 1.** tPARP-3 (1 μM) was incubated with 25 μM BioNAD<sup>+</sup>, 75 μM NAD<sup>+</sup>, Histone H1 (1 μM) and activated DNA (5 μg/ml) in PARP reaction buffer. At times 0, 5, 10, 15, 20 and 30 min samples were removed and the reaction was stopped by addition of LDS sample buffer.

**Supplemental Fig. 2.** Inhibition curve of PARP-3 using KU0058948.

**Supplemental Fig. 3.** Activity assay of PARP-3 and PARP-1 in the absence of activated DNA. PARP-3 was incubated with PARP-1, Bio-NAD<sup>+</sup>, NAD<sup>+</sup> in presence of Mg<sup>2+</sup> and Ca<sup>2+</sup>. At time 0 and after 2.5, 5 and 10 min of incubation at room temperature the reaction was stopped by dilution in LDS sample buffer.

Supplemental Fig. S1

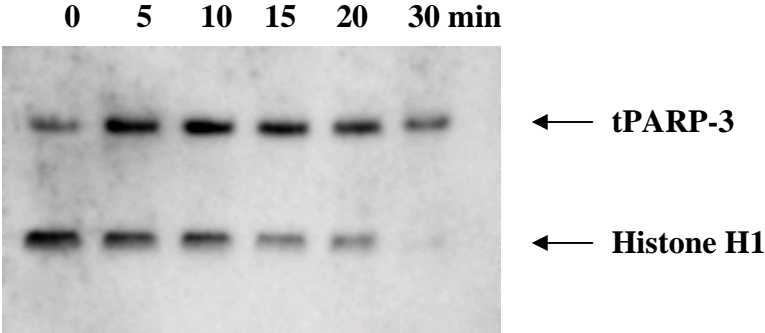

Supplemental Fig. S2

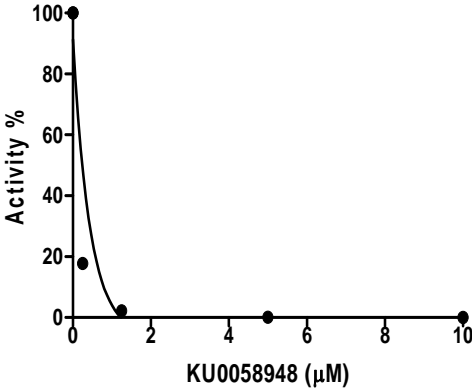

Supplemental Fig. S3

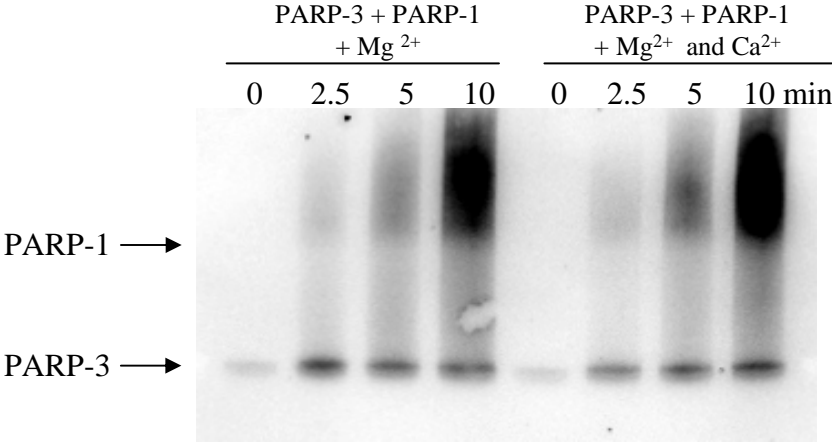

Supplement: supp_M109.077834_jbc.M109.077834-1.pdf [file supp_M109.077834_jbc.M109.077834-1.pdf]
